# Supplementary material for: Easy and accurate computation of energy barriers for carbocation solvation: an expeditious tool to face carbocation chemistry
Source: Royal Society of Chemistry journal article supplement (doi:10.1039/d3cp03544a), 2023-01-01
Supplement: d3cp03544a1.pdf [file d3cp03544a1.pdf]

ESI for:

*Easy and Accurate Computation of Energy Barriers  
for Carbocations Solvation: An Expeditious Tool to  
Face Carbocation Chemistry*

*Antonio G. Martínez,<sup>a,\*</sup> Hans-Ullrich Siehl,<sup>b</sup> Santiago de la Moya,<sup>a</sup> and Pedro C. Gómez<sup>c</sup>*

<sup>a</sup> *Departamento de Química Orgánica, Universidad Complutense de Madrid, Facultad de Ciencias  
Químicas, Ciudad Universitaria s/n, 28040 Madrid, Spain.*

<sup>b</sup> *Abteilung Organische Chemie I, Universität Ulm, Albert Einstein Alee 11, 89069 Ulm, Germany.*

<sup>c</sup> *Departamento de Química Física, Universidad Complutense de Madrid, Facultad de Ciencias Químicas,  
Ciudad Universitaria s/n, 28040 Madrid, Spain.*

|                                                                                                                                             |           |
|---------------------------------------------------------------------------------------------------------------------------------------------|-----------|
| <b>1. Cartesian coordinates for the B3LYP optimized geometries of carbocations, and carbocation-water complexes at the transition state</b> | <b>2</b>  |
| <b>2. Table S1</b>                                                                                                                          | <b>24</b> |

## 1. Cartesian coordinates for the B3LYP optimized geometries of carbocations, and carbocation-water complexes at the transition state

NOTES: R<sup>+</sup> indicates carbocation. R<sup>+</sup>-OH<sub>2</sub> indicates carbocation-water complex. fo<sub>opt</sub> indicates fully optimized geometry. F indicates optimization with frozen (F) coordinates. TS indicates transition state. Frozen carbocation (R<sub>F</sub><sup>+</sup>; see main text) geometries can be easily obtained by removing the water molecule from the frozen carbocation-water complex geometries at the transition state. TS structures were obtained by freezing the key C-O distance at 1.688 Å.

### *t*-Bu<sup>+</sup> C<sub>3h</sub> fo<sub>opt</sub>

```
1 1
C    0.000090  0.000112  0.000476
C   -1.019200  1.053742 -0.000522
C    1.422221  0.355723  0.001967
C   -0.403027 -1.409340 -0.001275
H   -1.679058  0.902973  0.871731
H   -1.691427  0.896393 -0.861368
H   -0.622851  2.069679 -0.005035
H    1.623378  0.973289 -0.891585
H    2.103596 -0.495296  0.031615
H    1.621282  1.044200  0.840282
H    0.040235 -1.899072  0.883613
H    0.085222 -1.919715 -0.848896
H   -1.480879 -1.573875 -0.024228
```

### *t*-Bu<sup>+</sup> C<sub>3v</sub> F

```
1 1
C   -0.001367 -0.001621 -0.053723
C   -1.401703 -0.441852 -0.013955
C    0.317508  1.432491 -0.013768
C    1.081919 -0.993191 -0.013827
H   -1.550600 -1.453752 -0.398384
H   -2.089308  0.275806 -0.470510
H   -1.672449 -0.474246  1.062262
H   -0.484487  2.065922 -0.400446
H    0.425407  1.686988  1.060855
H    1.281796  1.668934 -0.472606
H    1.314883 -1.138369  1.061568
H    2.008397 -0.634087 -0.471041
H    0.788218 -1.972159 -0.400057
```

2 1 4 11 -90.0 F

2 1 3 9 90.0 F

4 1 2 7 90.0 F

***t*-Bu<sup>+</sup> C<sub>s</sub> F**

1 1

|   |           |           |           |
|---|-----------|-----------|-----------|
| C | -0.010742 | -0.034393 | 0.000839  |
| C | -0.040680 | 1.438644  | 0.000900  |
| C | 1.280762  | -0.735428 | 0.000824  |
| C | -1.273010 | -0.774307 | 0.000824  |
| H | 0.523849  | 1.814926  | 0.869171  |
| H | -1.047302 | 1.858704  | 0.002075  |
| H | 0.521378  | 1.814514  | -0.869171 |
| H | 1.194200  | -1.821700 | -0.000336 |
| H | 1.874847  | -0.404037 | 0.868942  |
| H | 1.876297  | -0.402100 | -0.865540 |
| H | -1.167892 | -1.858688 | -0.000046 |
| H | -1.876297 | -0.440781 | -0.862656 |
| H | -1.875046 | -0.442230 | 0.865768  |

3 1 4 11 0.0 F

4 1 2 6 0.0 F

3 1 2 6 -180.0 F

**TS *t*-Bu<sup>+</sup>-OH<sub>2</sub> C<sub>3v</sub> F**

1 1

|   |           |           |           |
|---|-----------|-----------|-----------|
| C | -0.018883 | 0.131489  | 0.123661  |
| C | -1.320513 | 0.787486  | -0.272401 |
| C | 1.218510  | 0.969029  | -0.099044 |
| C | -0.050695 | -0.656996 | 1.413001  |
| H | -2.169848 | 0.099147  | -0.208477 |
| H | -1.268072 | 1.222667  | -1.273320 |
| H | -1.511168 | 1.598966  | 0.439700  |
| H | 1.247096  | 1.390946  | -1.106789 |
| H | 1.187559  | 1.801566  | 0.613539  |
| H | 2.140124  | 0.411632  | 0.099685  |
| H | -0.155318 | 0.058316  | 2.237788  |
| H | 0.876350  | -1.213066 | 1.584848  |
| H | -0.907753 | -1.335961 | 1.465561  |
| O | 0.148050  | -1.027303 | -1.092347 |
| H | 0.990487  | -1.522909 | -1.017162 |
| H | -0.584377 | -1.678926 | -1.087895 |

1 14 1.688 F

**Bn<sup>+</sup> C<sub>2v</sub> foft**

1 1

|   |           |           |           |
|---|-----------|-----------|-----------|
| C | -1.735368 | -0.042344 | 0.485872  |
| C | -1.058680 | -1.261536 | 0.269631  |
| C | 0.265961  | -1.239717 | -0.101670 |
| C | 0.946309  | 0.023091  | -0.264932 |
| C | 0.223706  | 1.251667  | -0.035469 |
| C | -1.100663 | 1.208846  | 0.334978  |
| C | 2.265585  | 0.055283  | -0.634372 |
| H | -2.781858 | -0.067881 | 0.778892  |
| H | -1.584620 | -2.201688 | 0.396861  |
| H | 0.814707  | -2.160846 | -0.275573 |
| H | 0.740708  | 2.198801  | -0.159907 |
| H | -1.658119 | 2.122559  | 0.511204  |
| H | 2.829919  | -0.857400 | -0.811809 |
| H | 2.798158  | 0.994717  | -0.763883 |

**TS Bn<sup>+</sup>-OH<sub>2</sub>F**

1 1

|   |           |           |           |
|---|-----------|-----------|-----------|
| C | 2.324207  | 0.000000  | 0.272820  |
| C | 1.651816  | 1.216997  | 0.110023  |
| C | 0.299460  | 1.221189  | -0.211435 |
| C | -0.389849 | 0.000000  | -0.372114 |
| C | 0.299460  | -1.221189 | -0.211435 |
| C | 1.651816  | -1.216997 | 0.110023  |
| C | -1.806787 | 0.000000  | -0.702399 |
| H | 3.382383  | 0.000000  | 0.516753  |
| H | 2.186708  | 2.154435  | 0.222981  |
| H | -0.220863 | 2.164565  | -0.361665 |
| H | -0.220863 | -2.164565 | -0.361664 |
| H | 2.186708  | -2.154434 | 0.222981  |
| H | -2.218263 | 0.903885  | -1.147056 |
| H | -2.218262 | -0.903886 | -1.147055 |
| O | -2.748242 | 0.000000  | 0.698674  |
| H | -2.536179 | 0.786190  | 1.246217  |
| H | -2.536173 | -0.786187 | 1.246220  |

7 15 1.688 F

**Ph(Me)CH<sup>+</sup> C<sub>s</sub> fopt**

1 1

|   |           |           |           |
|---|-----------|-----------|-----------|
| C | -2.286582 | -0.303766 | 0.000045  |
| C | -1.861158 | 1.035903  | -0.000007 |
| C | -0.509631 | 1.313561  | -0.000034 |
| C | 0.452203  | 0.246537  | -0.000060 |
| C | -0.014603 | -1.110657 | 0.000045  |
| C | -1.367770 | -1.372365 | -0.000032 |
| C | 1.802025  | 0.581144  | 0.000085  |
| C | 2.975133  | -0.305626 | -0.000008 |
| H | -3.351121 | -0.522096 | 0.000156  |
| H | -2.590484 | 1.838874  | -0.000049 |
| H | -0.157044 | 2.341226  | -0.000148 |
| H | 0.696162  | -1.929332 | 0.000097  |
| H | -1.729665 | -2.395062 | -0.000151 |
| H | 2.031354  | 1.647990  | 0.000295  |
| H | 3.603845  | -0.058200 | -0.870266 |
| H | 2.755436  | -1.372736 | -0.000592 |
| H | 3.603821  | -0.059049 | 0.870453  |

**TS Ph(Me)CH<sup>+</sup>-OH<sub>2</sub>F**

1 1

|   |           |           |           |
|---|-----------|-----------|-----------|
| C | -2.664826 | 0.173822  | 0.119231  |
| C | -1.825741 | 1.269250  | 0.354156  |
| C | -0.449644 | 1.139970  | 0.199107  |
| C | 0.100918  | -0.095376 | -0.199526 |
| C | -0.754243 | -1.192610 | -0.429900 |
| C | -2.130420 | -1.056548 | -0.272396 |
| C | 1.550467  | -0.290617 | -0.387922 |
| C | 2.450362  | 0.847864  | -0.788651 |
| H | -3.738804 | 0.283060  | 0.236804  |
| H | -2.248418 | 2.223737  | 0.651350  |
| H | 0.187007  | 2.002204  | 0.373265  |
| H | -0.337564 | -2.144715 | -0.750358 |
| H | -2.784070 | -1.901978 | -0.461562 |
| H | 1.784670  | -1.213694 | -0.915185 |
| H | 2.321577  | 1.738262  | -0.166271 |
| H | 2.187757  | 1.125932  | -1.816147 |
| H | 3.502100  | 0.546098  | -0.793659 |
| O | 2.161298  | -0.791017 | 1.103999  |
| H | 2.757724  | -0.138725 | 1.527579  |
| H | 1.416409  | -0.966569 | 1.717587  |

7 18 1.688 F

**Ph<sub>2</sub>CH<sup>+</sup> C<sub>2</sub> fopt**

1 1

|   |           |           |           |
|---|-----------|-----------|-----------|
| C | 1.291504  | -0.417969 | 0.038513  |
| C | 1.555800  | 0.936157  | 0.399902  |
| C | 2.852661  | 1.416214  | 0.394165  |
| C | 3.914566  | 0.571609  | 0.029770  |
| C | 3.685089  | -0.770889 | -0.301086 |
| C | 2.393875  | -1.268524 | -0.273911 |
| C | 0.000000  | -0.999680 | 0.000000  |
| C | -1.291504 | -0.417969 | -0.038513 |
| C | -1.555800 | 0.936157  | -0.399902 |
| C | -2.852661 | 1.416214  | -0.394165 |
| C | -3.914566 | 0.571609  | -0.029770 |
| C | -3.685089 | -0.770889 | 0.301086  |
| C | -2.393875 | -1.268524 | 0.273911  |
| H | 0.749878  | 1.572647  | 0.744598  |
| H | 3.054000  | 2.440582  | 0.690247  |
| H | 4.929459  | 0.958603  | 0.028534  |
| H | 4.515503  | -1.418213 | -0.562851 |
| H | 2.205185  | -2.309265 | -0.521973 |
| H | 0.000000  | -2.089966 | 0.000000  |
| H | -0.749878 | 1.572647  | -0.744598 |
| H | -3.053986 | 2.440582  | -0.690247 |
| H | -4.929459 | 0.958603  | -0.028534 |
| H | -4.515503 | -1.418213 | 0.562851  |
| H | -2.205185 | -2.309265 | 0.521973  |

**TS Ph<sub>2</sub>CH<sup>+</sup>-OH<sub>2</sub>F**

1 1

|   |           |           |           |
|---|-----------|-----------|-----------|
| C | 1.346652  | -0.351298 | -0.126642 |
| C | 1.612545  | 0.842053  | 0.575676  |
| C | 2.903421  | 1.359298  | 0.594899  |
| C | 3.938638  | 0.713169  | -0.090776 |
| C | 3.684405  | -0.465028 | -0.792550 |
| C | 2.394412  | -0.993328 | -0.811146 |
| C | -0.004478 | -0.990445 | -0.207845 |
| C | -1.342205 | -0.315084 | -0.222729 |
| C | -1.503147 | 1.071691  | -0.356324 |
| C | -2.781697 | 1.627165  | -0.333423 |
| C | -3.904644 | 0.808373  | -0.193520 |
| C | -3.755018 | -0.578572 | -0.101579 |
| C | -2.481743 | -1.140518 | -0.138909 |
| H | 0.828311  | 1.341778  | 1.132317  |
| H | 3.104873  | 2.271119  | 1.148498  |
| H | 4.941871  | 1.127914  | -0.070532 |
| H | 4.483981  | -0.971361 | -1.323820 |
| H | 2.197506  | -1.907367 | -1.366475 |
| H | -0.002632 | -2.019015 | -0.567687 |
| H | -0.640844 | 1.711620  | -0.503827 |
| H | -2.901087 | 2.700873  | -0.438939 |
| H | -4.897528 | 1.247354  | -0.179259 |
| H | -4.627459 | -1.220009 | -0.026411 |
| H | -2.371832 | -2.224203 | -0.116625 |
| O | -0.065822 | -1.074851 | 1.476927  |
| H | 0.683945  | -1.553649 | 1.899738  |
| H | -0.915387 | -1.431107 | 1.826816  |

7 25 1.688 F

**TS Ph<sub>2</sub>CH<sup>+</sup>-OH<sub>2</sub>F**

1 1

|   |           |           |           |
|---|-----------|-----------|-----------|
| C | 1.346652  | -0.351298 | -0.126642 |
| C | 1.612545  | 0.842053  | 0.575676  |
| C | 2.903421  | 1.359298  | 0.594899  |
| C | 3.938638  | 0.713169  | -0.090776 |
| C | 3.684405  | -0.465028 | -0.792550 |
| C | 2.394412  | -0.993328 | -0.811146 |
| C | -0.004478 | -0.990445 | -0.207845 |
| C | -1.342205 | -0.315084 | -0.222729 |
| C | -1.503147 | 1.071691  | -0.356324 |
| C | -2.781697 | 1.627165  | -0.333423 |
| C | -3.904644 | 0.808373  | -0.193520 |
| C | -3.755018 | -0.578572 | -0.101579 |
| C | -2.481743 | -1.140518 | -0.138909 |
| H | 0.828311  | 1.341778  | 1.132317  |
| H | 3.104873  | 2.271119  | 1.148498  |
| H | 4.941871  | 1.127914  | -0.070532 |
| H | 4.483981  | -0.971361 | -1.323820 |
| H | 2.197506  | -1.907367 | -1.366475 |
| H | -0.002632 | -2.019015 | -0.567687 |
| H | -0.640844 | 1.711620  | -0.503827 |
| H | -2.901087 | 2.700873  | -0.438939 |
| H | -4.897528 | 1.247354  | -0.179259 |
| H | -4.627459 | -1.220009 | -0.026411 |
| H | -2.371832 | -2.224203 | -0.116625 |
| O | -0.065822 | -1.074851 | 1.476927  |
| H | 0.683945  | -1.553649 | 1.899738  |
| H | -0.915387 | -1.431107 | 1.826816  |

7 25 1.688 F

**Cumyl<sup>+</sup> C<sub>s</sub> fo<sub>pt</sub>**

1 1

|   |           |           |           |
|---|-----------|-----------|-----------|
| C | 0.166122  | -0.334991 | -2.643800 |
| C | -1.041061 | -0.314194 | -1.927261 |
| C | -1.019165 | -0.314087 | -0.546265 |
| C | 0.222656  | -0.313644 | 0.168610  |
| C | 1.434769  | -0.324448 | -0.595566 |
| C | 1.401123  | -0.345215 | -1.976089 |
| C | 0.251053  | -0.303070 | 1.582748  |
| C | -0.981979 | -0.314453 | 2.420120  |
| C | 1.516617  | -0.280182 | 2.369690  |
| H | 0.144272  | -0.343307 | -3.729965 |
| H | -1.987564 | -0.303116 | -2.457214 |
| H | -1.958679 | -0.295639 | -0.008286 |
| H | 2.395142  | -0.334961 | -0.095444 |
| H | 2.325592  | -0.364639 | -2.543411 |
| H | -1.775589 | 0.207428  | 1.860000  |
| H | -0.826065 | 0.275116  | 3.330093  |
| H | -1.350464 | -1.302582 | 2.690781  |
| H | 1.341675  | 0.168915  | 3.353394  |
| H | 2.353622  | 0.223160  | 1.888565  |
| H | 1.810500  | -1.324432 | 2.567627  |

**TS Cumyl<sup>+</sup>-OH<sub>2</sub> F**

1 1

|   |           |           |           |
|---|-----------|-----------|-----------|
| C | 2.917023  | -0.006593 | 0.019323  |
| C | 2.212821  | -1.211633 | -0.024752 |
| C | 0.821724  | -1.205737 | -0.085761 |
| C | 0.106891  | 0.010619  | -0.100131 |
| C | 0.833363  | 1.217169  | -0.052288 |
| C | 2.224099  | 1.206048  | 0.004064  |
| C | -1.390240 | 0.018226  | -0.164764 |
| C | -2.071046 | -1.220007 | -0.721009 |
| C | -2.068736 | 1.299743  | -0.606435 |
| O | -1.800810 | -0.002528 | 1.472412  |
| H | 4.001975  | -0.012419 | 0.061259  |
| H | 2.745982  | -2.157094 | -0.021753 |
| H | 0.305178  | -2.157851 | -0.140319 |
| H | 0.322773  | 2.172834  | -0.067004 |
| H | 2.766871  | 2.145535  | 0.033078  |
| H | -1.835761 | -1.285976 | -1.789034 |
| H | -3.159679 | -1.143129 | -0.634697 |
| H | -1.741570 | -2.149925 | -0.253301 |
| H | -3.156188 | 1.215182  | -0.525431 |
| H | -1.826718 | 1.467474  | -1.661671 |
| H | -1.742947 | 2.168767  | -0.034377 |
| H | -1.114273 | -0.486908 | 1.977968  |
| H | -2.674561 | -0.403269 | 1.666504  |

7 10 1.688 F

**(*p*-MeOPh)(C<sub>6</sub>H<sub>4</sub>)(CF<sub>3</sub>)<sub>2</sub>C<sup>+</sup> C<sub>s</sub> fopt**

1 1

|   |           |           |           |
|---|-----------|-----------|-----------|
| C | -3.084048 | -0.262373 | 0.017408  |
| C | -2.267167 | -1.436416 | 0.097478  |
| C | -0.914498 | -1.330984 | 0.086521  |
| C | -0.248199 | -0.029072 | 0.009723  |
| C | -1.119662 | 1.140752  | -0.063928 |
| C | -2.476928 | 1.029825  | -0.068866 |
| O | -4.368144 | -0.474989 | 0.028507  |
| C | 1.122925  | 0.058054  | 0.000859  |
| C | 1.971030  | 1.338267  | 0.029941  |
| C | 1.986267  | -1.224512 | -0.039264 |
| F | 3.280235  | -0.964872 | -0.184788 |
| F | 1.595692  | -1.995559 | -1.070373 |
| F | 1.808152  | -1.914691 | 1.100981  |
| F | 2.827021  | 1.251975  | 1.053229  |
| F | 1.265181  | 2.469122  | 0.195113  |
| F | 2.642677  | 1.434012  | -1.121700 |
| F | -5.339607 | 0.606845  | -0.043634 |
| H | -2.764312 | -2.397828 | 0.168171  |
| H | -0.324691 | -2.233360 | 0.156414  |
| H | -0.681409 | 2.123105  | -0.142457 |
| H | -3.089451 | 1.920362  | -0.141379 |
| H | -6.306390 | 0.109371  | -0.009213 |
| H | -5.220707 | 1.146820  | -0.985674 |
| H | -5.219189 | 1.269246  | 0.816506  |



**TS (*p*-MeO)(C<sub>6</sub>H<sub>4</sub>)(CF<sub>3</sub>)<sub>2</sub>C<sup>+</sup>-OH<sub>2</sub>F**

1 1

|   |           |           |           |
|---|-----------|-----------|-----------|
| C | 3.181837  | -0.288087 | 0.074802  |
| C | 2.532044  | 0.914316  | -0.272344 |
| C | 1.153508  | 0.999214  | -0.206810 |
| C | 0.360337  | -0.117420 | 0.165965  |
| C | 1.037873  | -1.322329 | 0.518403  |
| C | 2.409389  | -1.399923 | 0.485552  |
| C | -1.093606 | -0.041992 | 0.216072  |
| O | 4.497731  | -0.475961 | 0.056847  |
| C | 5.375822  | 0.587046  | -0.352548 |
| C | -1.748043 | 1.353994  | -0.007306 |
| C | -1.929473 | -1.173503 | -0.466496 |
| F | -2.089254 | -0.827291 | -1.743239 |
| F | -3.143201 | -1.284300 | 0.116834  |
| F | -1.345715 | -2.366553 | -0.404388 |
| F | -1.237645 | 2.223497  | 0.890416  |
| F | -3.071141 | 1.293685  | 0.211136  |
| F | -1.528295 | 1.805259  | -1.235655 |
| O | -1.542925 | -0.325212 | 1.818333  |
| H | 3.098455  | 1.780048  | -0.592460 |
| H | 0.698056  | 1.938145  | -0.490451 |
| H | 0.479884  | -2.188645 | 0.846975  |
| H | 2.925934  | -2.310919 | 0.767592  |
| H | 6.379744  | 0.170994  | -0.283000 |
| H | 5.281818  | 1.445820  | 0.319583  |
| H | 5.166810  | 0.883316  | -1.385259 |
| H | -2.516687 | -0.295841 | 1.961334  |
| H | -1.093329 | 0.319903  | 2.406552  |

7 18 1.688 F

**(*p*-MeOPh)(Me)<sub>2</sub>C<sup>+</sup> foft**

1 1

|   |           |           |           |
|---|-----------|-----------|-----------|
| C | -1.368210 | 0.126190  | -0.001404 |
| C | -0.767593 | -1.163239 | -0.000916 |
| C | 0.599014  | -1.267441 | -0.001495 |
| C | 1.456284  | -0.112625 | -0.001923 |
| C | 0.809600  | 1.175018  | -0.002182 |
| C | -0.551682 | 1.291397  | -0.002136 |
| C | 2.847839  | -0.256729 | -0.001495 |
| O | -2.666290 | 0.345245  | -0.001221 |
| C | -3.613205 | -0.747147 | -0.000366 |
| C | 3.503800  | -1.609726 | -0.002197 |
| C | 3.801117  | 0.888184  | 0.000687  |
| H | -1.379486 | -2.056931 | -0.000244 |
| H | 1.038100  | -2.258438 | -0.000977 |
| H | 1.402405  | 2.080933  | -0.002884 |
| H | -1.042587 | 2.258438  | -0.002563 |
| H | -4.591476 | -0.270035 | -0.000504 |
| H | -3.490524 | -1.353668 | 0.901062  |
| H | -3.490829 | -1.354828 | -0.901047 |
| H | 3.220840  | -2.186249 | 0.887146  |
| H | 4.591461  | -1.521606 | -0.013672 |
| H | 3.202087  | -2.197571 | -0.877426 |
| H | 3.354218  | 1.880127  | 0.006836  |
| H | 4.459656  | 0.802078  | -0.875809 |
| H | 4.465881  | 0.794006  | 0.871536  |

**TS (*p*-MeOPh)(Me)<sub>2</sub>C<sup>+</sup>-OH<sub>2</sub> F**

1 1

|   |           |           |           |
|---|-----------|-----------|-----------|
| C | -2.070435 | 0.286803  | -0.013904 |
| C | -1.456002 | -0.979910 | -0.028126 |
| C | -0.072535 | -1.073335 | -0.078624 |
| C | 0.749130  | 0.073533  | -0.105845 |
| C | 0.111024  | 1.337315  | -0.073921 |
| C | -1.265483 | 1.443988  | -0.037938 |
| C | 2.228101  | -0.049058 | -0.156873 |
| O | -3.391415 | 0.497635  | 0.022629  |
| C | -4.289308 | -0.619732 | 0.031497  |
| C | 2.806440  | -1.192816 | -0.968239 |
| C | 3.033960  | 1.231102  | -0.298234 |
| H | -2.049162 | -1.886032 | -0.006241 |
| H | 0.367069  | -2.065352 | -0.086023 |
| H | 0.691317  | 2.252689  | -0.107742 |
| H | -1.753717 | 2.412587  | -0.033238 |
| H | -5.288848 | -0.187057 | 0.053049  |
| H | -4.135732 | -1.237579 | 0.922960  |
| H | -4.168349 | -1.224834 | -0.873429 |
| H | 2.334283  | -2.150580 | -0.748640 |
| H | 3.885799  | -1.287118 | -0.814351 |
| H | 2.639928  | -0.966376 | -2.027067 |
| H | 2.760290  | 1.994078  | 0.434412  |
| H | 2.859393  | 1.646303  | -1.296557 |
| H | 4.107047  | 1.028785  | -0.220239 |
| O | 2.596099  | -0.566451 | 1.407168  |
| H | 3.505635  | -0.358414 | 1.710039  |
| H | 1.958229  | -0.167899 | 2.035934  |

7 25 1.688 F

**Trityl<sup>+</sup> C<sub>3v</sub> foft**

1 1

|   |           |           |           |
|---|-----------|-----------|-----------|
| C | -1.369244 | 0.477380  | 0.000569  |
| C | -1.720942 | 1.677102  | -0.673540 |
| C | -3.035946 | 2.119612  | -0.683569 |
| C | -4.022845 | 1.398976  | -0.000107 |
| C | -3.695455 | 0.221979  | 0.683819  |
| C | -2.389232 | -0.245778 | 0.674420  |
| C | -0.000434 | 0.000837  | 0.000642  |
| C | 1.097219  | 0.947487  | 0.000230  |
| C | 0.982457  | 2.193083  | 0.673080  |
| C | 2.042110  | 3.088773  | 0.682240  |
| C | 3.225055  | 2.781467  | -0.000853 |
| C | 3.354182  | 1.565894  | -0.683417 |
| C | 2.312006  | 0.649956  | -0.673088 |
| C | 0.271043  | -1.423094 | 0.000833  |
| C | -0.591844 | -2.326964 | -0.674376 |
| C | -0.317885 | -3.687189 | -0.685140 |
| C | 0.798788  | -4.182273 | -0.000880 |
| C | 1.653989  | -3.310947 | 0.684396  |
| C | 1.406642  | -1.945630 | 0.675367  |
| H | -0.964028 | 2.217904  | -1.230948 |
| H | -3.298766 | 3.021195  | -1.227747 |
| H | -5.048818 | 1.755234  | -0.000571 |
| H | -4.460838 | -0.322700 | 1.227465  |
| H | -2.130584 | -1.139539 | 1.231476  |
| H | 0.079393  | 2.418122  | 1.229796  |
| H | 1.954455  | 4.024388  | 1.225370  |
| H | 4.047736  | 3.490512  | -0.001149 |
| H | 4.266398  | 1.340795  | -1.226772 |
| H | 2.400676  | -0.276866 | -1.229053 |
| H | -1.438580 | -1.941429 | -1.231593 |
| H | -0.967054 | -4.365103 | -1.230170 |
| H | 1.002841  | -5.249012 | -0.001597 |
| H | 2.507647  | -3.702112 | 1.228741  |
| H | 2.051542  | -1.275407 | 1.232992  |

**TS Trityl<sup>+</sup>-OH<sub>2</sub> F**

1 1

|   |           |           |           |
|---|-----------|-----------|-----------|
| C | -1.160752 | -0.926846 | 0.089033  |
| C | -2.239249 | -0.491687 | -0.695149 |
| C | -3.303279 | -1.351692 | -0.970353 |
| C | -3.315455 | -2.646611 | -0.453558 |
| C | -2.244974 | -3.094868 | 0.326159  |
| C | -1.171269 | -2.248227 | 0.582273  |
| C | -0.003478 | -0.011991 | 0.399632  |
| C | -0.213241 | 1.455735  | 0.119415  |
| C | -1.237104 | 2.170254  | 0.771551  |
| C | -1.451035 | 3.514833  | 0.480873  |
| C | -0.668807 | 4.158283  | -0.482497 |
| C | 0.331078  | 3.451741  | -1.150835 |
| C | 0.566973  | 2.110382  | -0.848056 |
| C | 1.379690  | -0.541873 | 0.107547  |
| C | 1.579369  | -1.633938 | -0.751834 |
| C | 2.869841  | -2.090486 | -1.026478 |
| C | 3.975137  | -1.475769 | -0.440002 |
| C | 3.791969  | -0.380287 | 0.409756  |
| C | 2.509038  | 0.090506  | 0.668452  |
| H | -2.242665 | 0.510938  | -1.105483 |
| H | -4.125178 | -1.003150 | -1.587981 |
| H | -4.149944 | -3.309163 | -0.662213 |
| H | -2.241904 | -4.105387 | 0.722876  |
| H | -0.326667 | -2.634372 | 1.150860  |
| H | -1.862199 | 1.675264  | 1.507944  |
| H | -2.233460 | 4.058427  | 1.001543  |
| H | -0.842752 | 5.204986  | -0.713180 |
| H | 0.934730  | 3.942585  | -1.907961 |
| H | 1.343558  | 1.571113  | -1.378328 |
| H | 0.731974  | -2.116505 | -1.223923 |
| H | 3.005972  | -2.929695 | -1.701513 |
| H | 4.976697  | -1.838675 | -0.649832 |
| H | 4.648321  | 0.113444  | 0.858623  |
| H | 2.395061  | 0.976328  | 1.291197  |
| O | -0.080654 | -0.011550 | 2.085866  |
| H | 0.625271  | 0.553357  | 2.465837  |
| H | 0.041697  | -0.921858 | 2.429049  |

7 35 1.688 F

**Tropylium<sup>+</sup> foft**

1 1

|   |           |           |           |
|---|-----------|-----------|-----------|
| C | -1.362869 | 0.861084  | -0.000046 |
| C | -1.522949 | -0.528625 | -0.000275 |
| C | -0.176468 | 1.602356  | 0.000259  |
| C | -0.536255 | -1.520218 | 0.000198  |
| C | 1.142792  | 1.137039  | -0.000061 |
| C | 1.601500  | -0.184555 | -0.000229 |
| C | 0.854233  | -1.367081 | 0.000153  |
| H | -2.282150 | 1.441910  | -0.000076 |
| H | -2.550171 | -0.885315 | -0.000641 |
| H | -0.295593 | 2.683212  | 0.000580  |
| H | -0.897873 | -2.545731 | 0.000458  |
| H | 1.913605  | 1.904037  | -0.000122 |
| H | 2.681763  | -0.308990 | -0.000534 |
| H | 1.430481  | -2.289230 | 0.000336  |

**TS Tropylium<sup>+</sup>-OH<sub>2</sub> F**

1 1

|   |           |           |           |
|---|-----------|-----------|-----------|
| C | -0.750927 | -1.551916 | -0.212981 |
| C | 0.515390  | -1.264373 | -0.645327 |
| C | -1.718024 | -0.686592 | 0.376271  |
| C | 1.222330  | 0.000032  | -0.510204 |
| C | -1.718045 | 0.686545  | 0.376284  |
| C | -0.750973 | 1.551913  | -0.212947 |
| C | 0.515352  | 1.264417  | -0.645296 |
| H | -1.068365 | -2.585532 | -0.335900 |
| H | 1.078357  | -2.068913 | -1.112536 |
| H | -2.596985 | -1.175231 | 0.788816  |
| H | 2.172574  | 0.000051  | -1.041838 |
| H | -2.597020 | 1.175148  | 0.788840  |
| H | -1.068443 | 2.585522  | -0.335841 |
| H | 1.078295  | 2.068987  | -1.112480 |
| O | 1.805913  | 0.000010  | 1.073708  |
| H | 2.331598  | -0.795542 | 1.308279  |
| H | 2.332070  | 0.795274  | 1.308197  |

4 15 1.688 F

**Ph(OMe)<sub>2</sub>C<sup>+</sup> C<sub>1</sub> foft**

1 1

|   |           |           |           |
|---|-----------|-----------|-----------|
| C | 1.052840  | -0.085935 | -0.077195 |
| C | -0.398317 | -0.082758 | -0.033407 |
| O | 1.628402  | -1.229378 | -0.265101 |
| O | 1.850572  | 0.928481  | 0.042903  |
| C | 1.487151  | 2.245984  | 0.565779  |
| C | 3.088417  | -1.352685 | -0.240924 |
| C | -1.153719 | 1.027005  | -0.471924 |
| C | -2.541101 | 0.960392  | -0.462338 |
| C | -3.184981 | -0.194024 | -0.003741 |
| C | -2.442443 | -1.299239 | 0.426131  |
| C | -1.055172 | -1.256561 | 0.399490  |
| H | 2.365100  | 2.567723  | 1.123887  |
| H | 0.613008  | 2.169818  | 1.211546  |
| H | 1.310605  | 2.912233  | -0.278513 |
| H | 3.508529  | -0.789087 | -1.074439 |
| H | 3.266463  | -2.419137 | -0.356018 |
| H | 3.470259  | -0.984131 | 0.711907  |
| H | -0.668338 | 1.911716  | -0.866841 |
| H | -3.122441 | 1.804475  | -0.818578 |
| H | -4.269980 | -0.234620 | 0.011129  |
| H | -2.947375 | -2.193449 | 0.776577  |
| H | -0.473664 | -2.111433 | 0.725711  |

**TS Ph(OMe)<sub>2</sub>C<sup>+</sup>-OH<sub>2</sub>F**

1 1

|   |           |           |           |
|---|-----------|-----------|-----------|
| C | 1.089518  | -0.145722 | 0.101083  |
| O | -0.409858 | 0.009784  | 0.077986  |
| O | 1.563087  | -1.369623 | -0.192192 |
| C | 1.859598  | 0.828788  | -0.375027 |
| C | 1.780344  | 2.200190  | 0.085751  |
| C | 1.393335  | -1.830178 | -1.560639 |
| C | -1.024465 | 1.005799  | -0.694985 |
| C | -2.416451 | 1.078237  | -0.761039 |
| C | -3.201918 | 0.159937  | -0.064015 |
| C | -2.595771 | -0.855726 | 0.682289  |
| C | -1.208304 | -0.938693 | 0.743158  |
| H | 2.618639  | 2.368797  | 0.767004  |
| H | 0.824790  | 2.416610  | 0.569804  |
| H | 1.896938  | 2.833169  | -0.794002 |
| H | 0.332352  | -1.863823 | -1.822071 |
| H | 1.819606  | -2.831696 | -1.569565 |
| H | 1.944881  | -1.177231 | -2.240282 |
| H | -0.427927 | 1.703785  | -1.271869 |
| H | -2.883912 | 1.848968  | -1.365678 |
| H | -4.284571 | 0.221653  | -0.115274 |
| H | -3.203548 | -1.589597 | 1.202057  |
| H | -0.753808 | -1.772705 | 1.275468  |
| O | 1.508238  | -0.206104 | 1.735210  |
| H | 0.982152  | -0.907351 | 2.174323  |
| H | 1.248443  | 0.623166  | 2.188627  |

1 23 1.688 F

**Ph(OCH<sub>2</sub>)<sub>2</sub>C<sup>+</sup> C<sub>2v</sub> fopt**

1 1

|   |           |           |           |
|---|-----------|-----------|-----------|
| C | 0.898346  | -0.000001 | -0.000001 |
| C | -0.529578 | 0.000000  | -0.000001 |
| O | 1.599739  | 1.097605  | -0.021568 |
| O | 1.599739  | -1.097606 | 0.021567  |
| C | 3.029910  | -0.769126 | -0.031066 |
| C | 3.029910  | 0.769127  | 0.031068  |
| C | -1.227744 | -1.229890 | 0.002680  |
| C | -2.614124 | -1.219765 | 0.002832  |
| C | -3.303982 | 0.000000  | 0.000001  |
| C | -2.614123 | 1.219765  | -0.002832 |
| C | -1.227743 | 1.229890  | -0.002681 |
| H | 3.501400  | -1.253466 | 0.823776  |
| H | 3.416371  | -1.180099 | -0.964401 |
| H | 3.416369  | 1.180100  | 0.964405  |
| H | 3.501402  | 1.253467  | -0.823773 |
| H | -0.680826 | -2.166585 | 0.004060  |
| H | -3.162468 | -2.155876 | 0.004731  |
| H | -4.390019 | 0.000001  | 0.000002  |
| H | -3.162467 | 2.155876  | -0.004730 |
| H | -0.680825 | 2.166585  | -0.004062 |

**TS Ph(OCH<sub>2</sub>)<sub>2</sub>C-OH<sub>2</sub> F**

1 1

|   |           |           |           |
|---|-----------|-----------|-----------|
| C | -0.825975 | -0.007811 | 0.100517  |
| C | 0.652982  | 0.003674  | -0.028149 |
| O | -1.471323 | -1.077378 | -0.367061 |
| O | -1.483370 | 1.133677  | -0.130929 |
| C | -2.821494 | 0.813586  | -0.627534 |
| C | -2.876324 | -0.717621 | -0.525426 |
| C | 1.342044  | 1.225515  | -0.021791 |
| C | 2.731726  | 1.225702  | -0.120313 |
| C | 3.427959  | 0.018265  | -0.221508 |
| C | 2.737333  | -1.196957 | -0.230814 |
| C | 1.348010  | -1.211442 | -0.132552 |
| H | -3.552962 | 1.322380  | 0.000962  |
| H | -2.877145 | 1.188561  | -1.650797 |
| H | -3.428611 | -1.073413 | 0.347291  |
| H | -3.232268 | -1.215194 | -1.426770 |
| H | 0.796057  | 2.161930  | 0.034810  |
| H | 3.269958  | 2.168209  | -0.126930 |
| H | 4.510727  | 0.024420  | -0.301852 |
| H | 3.279715  | -2.132447 | -0.324221 |
| H | 0.806618  | -2.152235 | -0.165347 |
| O | -1.101267 | -0.170440 | 1.757957  |
| H | -0.815507 | 0.631442  | 2.243334  |
| H | -0.606472 | -0.927981 | 2.135204  |

1 21 1.688 F

**(MeO)<sub>3</sub>C<sup>+</sup> C<sub>3h</sub> fopt**

1 1

|   |           |           |           |
|---|-----------|-----------|-----------|
| C | 0.000153  | -0.000275 | 0.000717  |
| O | 0.677231  | 1.093400  | 0.000366  |
| O | 0.608856  | -1.133362 | 0.000320  |
| O | -1.285538 | 0.039505  | 0.000275  |
| C | -0.016235 | 2.395660  | -0.000412 |
| C | -2.067642 | -1.211533 | -0.000366 |
| C | 2.083420  | -1.183609 | -0.000412 |
| H | 0.792450  | 3.122025  | -0.004211 |
| H | -0.621735 | 2.473831  | 0.902359  |
| H | -0.627106 | 2.470291  | -0.899826 |
| H | -3.100769 | -0.873520 | -0.002121 |
| H | -1.831680 | -1.776184 | 0.901398  |
| H | -1.828934 | -1.777176 | -0.900787 |
| H | 2.308411  | -2.247070 | -0.007416 |
| H | 2.453354  | -0.700974 | 0.903976  |
| H | 2.453415  | -0.688980 | -0.898239 |

**TS (MeO)<sub>3</sub>C<sup>+</sup>-OH<sub>2</sub> F**

1 1

|   |           |           |           |
|---|-----------|-----------|-----------|
| C | -0.000512 | -0.009402 | 0.027115  |
| O | -1.252077 | 0.200996  | -0.342143 |
| O | 0.832070  | 1.010040  | -0.154200 |
| O | 0.508818  | -1.210922 | -0.197080 |
| C | -2.144173 | -0.946912 | -0.487680 |
| C | 1.942551  | -1.365582 | -0.411334 |
| C | 0.296972  | 2.336054  | -0.434434 |
| H | -1.774387 | -1.597503 | -1.280174 |
| H | -3.104159 | -0.510700 | -0.756073 |
| H | -2.212937 | -1.486942 | 0.458368  |
| H | 2.074601  | -2.433321 | -0.574112 |
| H | 2.504249  | -1.042447 | 0.468652  |
| H | 2.250550  | -0.794328 | -1.287136 |
| H | -0.299239 | 2.310492  | -1.346373 |
| H | 1.178076  | 2.962332  | -0.559457 |
| H | -0.307038 | 2.694363  | 0.403667  |
| O | -0.204887 | -0.085612 | 1.700963  |
| H | -0.584342 | 0.738589  | 2.069215  |
| H | 0.634207  | -0.241497 | 2.181105  |

1 17 1.688 F

**(MeO)(OCH<sub>2</sub>)<sub>2</sub>C<sup>+</sup> C<sub>1</sub> fopt**

1 1

|   |           |           |           |
|---|-----------|-----------|-----------|
| C | 0.245174  | -0.280708 | -0.003956 |
| O | -0.700687 | -1.162508 | -0.032509 |
| O | -0.113584 | 0.967304  | 0.026811  |
| O | 1.455101  | -0.664177 | -0.006558 |
| C | -1.993644 | -0.461740 | 0.040253  |
| C | 2.550511  | 0.331350  | 0.006792  |
| C | -1.588370 | 1.027169  | -0.034570 |
| H | -2.456360 | -0.752260 | 0.983683  |
| H | -2.590014 | -0.806482 | -0.803678 |
| H | 3.450854  | -0.277044 | -0.006100 |
| H | 2.475859  | 0.920921  | 0.920385  |
| H | 2.470648  | 0.951788  | -0.885695 |
| H | -1.842823 | 1.515393  | -0.975414 |
| H | -1.916833 | 1.626307  | 0.813753  |



**TS (MeO)(OCH<sub>2</sub>)<sub>2</sub>C<sup>+</sup>-OH<sub>2</sub> F**

1 1

|   |           |           |           |
|---|-----------|-----------|-----------|
| C | -0.191063 | 0.121799  | -0.178389 |
| O | 0.766665  | 0.552215  | -0.994029 |
| O | 0.245431  | -0.755392 | 0.734874  |
| O | -1.342009 | -0.039268 | -0.767069 |
| C | 2.048068  | 0.175300  | -0.415694 |
| C | -2.410370 | -0.730582 | -0.050414 |
| C | 1.666153  | -1.007415 | 0.474195  |
| H | 2.450514  | 1.026896  | 0.136697  |
| H | 2.710725  | -0.075879 | -1.239300 |
| H | -3.214568 | -0.806770 | -0.774268 |
| H | -2.718591 | -0.135799 | 0.808048  |
| H | -2.066909 | -1.715537 | 0.257166  |
| H | 1.738804  | -1.970105 | -0.030131 |
| H | 2.181428  | -1.041950 | 1.430849  |
| O | -0.541289 | 1.432692  | 0.825725  |
| H | -0.059624 | 1.568174  | 1.655133  |
| H | -0.728889 | 2.274382  | 0.381616  |

1 15 1.688 F

**Me(OMe)<sub>2</sub>C<sup>+</sup> C<sub>s</sub> foft**

1 1

|   |           |           |           |
|---|-----------|-----------|-----------|
| C | -0.000997 | 0.409350  | 0.000001  |
| C | -0.750532 | 1.696168  | 0.000001  |
| O | -0.513358 | -0.769142 | 0.000002  |
| O | 1.276134  | 0.497200  | -0.000002 |
| C | 2.128640  | -0.706025 | -0.000003 |
| C | -1.962583 | -1.023314 | 0.000002  |
| H | -1.830618 | 1.559902  | 0.000006  |
| H | -0.451191 | 2.276302  | -0.880553 |
| H | -0.451184 | 2.276305  | 0.880551  |
| H | 3.140735  | -0.309896 | -0.000010 |
| H | 1.922471  | -1.284836 | -0.900469 |
| H | 1.922481  | -1.284830 | 0.900468  |
| H | -2.401331 | -0.603187 | 0.905372  |
| H | -2.039403 | -2.108121 | -0.000003 |
| H | -2.401332 | -0.603179 | -0.905364 |

**TS Me(OMe)<sub>2</sub>C<sup>+</sup>-OH<sub>2</sub>F**

1 1

|   |           |           |           |
|---|-----------|-----------|-----------|
| C | 0.007303  | 0.285682  | -0.179606 |
| C | -0.746490 | 1.305166  | -1.001408 |
| O | -0.481211 | -0.935305 | 0.011786  |
| O | 1.312012  | 0.317523  | -0.412845 |
| C | 2.140001  | -0.836166 | -0.089035 |
| C | -1.917224 | -1.163982 | 0.012594  |
| H | -1.748791 | 1.491564  | -0.613107 |
| H | -0.821252 | 0.916823  | -2.022048 |
| H | -0.181078 | 2.239004  | -1.044530 |
| H | 3.146665  | -0.532928 | -0.369695 |
| H | 1.816886  | -1.701408 | -0.667829 |
| H | 2.097196  | -1.060540 | 0.980575  |
| H | -2.399049 | -0.552304 | 0.778884  |
| H | -2.028528 | -2.220913 | 0.248211  |
| H | -2.331859 | -0.955016 | -0.975374 |
| O | -0.183745 | 0.938429  | 1.365310  |
| H | 0.249745  | 0.402142  | 2.060206  |
| H | 0.122082  | 1.864210  | 1.455431  |

1 16 1.688 F

**Me(OCH<sub>2</sub>)<sub>2</sub>C<sup>+</sup> C<sub>1</sub> fo<sub>1</sub>t**

1 1

|   |           |           |           |
|---|-----------|-----------|-----------|
| C | 0.685398  | 0.005095  | -0.001903 |
| C | 2.161695  | 0.006584  | 0.000512  |
| O | 0.007987  | -1.089535 | -0.001291 |
| O | 0.000369  | 1.093385  | -0.001607 |
| C | -1.443674 | 0.766987  | 0.001184  |
| C | -1.438070 | -0.773716 | 0.000779  |
| H | 2.540959  | 1.027585  | -0.041126 |
| H | 2.523582  | -0.575172 | -0.855049 |
| H | 2.516742  | -0.494959 | 0.909077  |
| H | -1.862228 | 1.220679  | 0.899247  |
| H | -1.865832 | 1.221265  | -0.894877 |
| H | -1.854902 | -1.230141 | 0.898232  |
| H | -1.857265 | -1.229750 | -0.895766 |

**TS Me(OCH<sub>2</sub>)<sub>2</sub>C<sup>+</sup>-OH<sub>2</sub> F**

1 1

|   |           |           |           |
|---|-----------|-----------|-----------|
| C | -0.517800 | -0.188283 | 0.067363  |
| C | -1.825519 | -0.883801 | 0.315693  |
| O | 0.211163  | -0.631381 | -0.952791 |
| O | 0.208121  | 0.109918  | 1.138921  |
| C | 1.595923  | 0.295964  | 0.714867  |
| C | 1.623801  | -0.354941 | -0.680313 |
| H | -2.405901 | -0.363049 | 1.080462  |
| H | -1.598268 | -1.890256 | 0.679499  |
| H | -2.401393 | -0.972470 | -0.608040 |
| H | 1.810939  | 1.366053  | 0.698930  |
| H | 2.220850  | -0.202496 | 1.455144  |
| H | 2.003060  | 0.303540  | -1.462527 |
| H | 2.141361  | -1.314276 | -0.713354 |
| O | -0.941013 | 1.348817  | -0.487217 |
| H | -1.475187 | 1.883860  | 0.135598  |
| H | -1.380064 | 1.356635  | -1.362683 |

1 14 1.688 F

**Ph(MeO)(Me)C<sup>+</sup> C<sub>1</sub> fopt**

1 1

|   |           |           |           |
|---|-----------|-----------|-----------|
| C | 1.678177  | 0.458328  | -0.157654 |
| C | 0.275864  | 0.129379  | -0.084625 |
| O | 2.658951  | -0.371231 | -0.025909 |
| C | 2.161850  | 1.853745  | -0.395752 |
| C | 2.604813  | -1.746200 | 0.464386  |
| C | -0.632629 | 1.155762  | 0.285187  |
| C | -1.992600 | 0.896637  | 0.355865  |
| C | -2.480621 | -0.370255 | 0.013504  |
| C | -1.604202 | -1.382706 | -0.394806 |
| C | -0.237656 | -1.147705 | -0.431473 |
| H | 3.204315  | 1.832657  | -0.718353 |
| H | 2.118073  | 2.416031  | 0.548080  |
| H | 1.544357  | 2.375992  | -1.129272 |
| H | 2.562164  | -2.416031 | -0.395233 |
| H | 1.752029  | -1.882767 | 1.129288  |
| H | 3.548019  | -1.876144 | 0.993057  |
| H | -0.265015 | 2.141312  | 0.548706  |
| H | -2.676346 | 1.679520  | 0.666977  |
| H | -3.548035 | -0.565918 | 0.053543  |
| H | -1.991486 | -2.352600 | -0.689255 |
| H | 0.417603  | -1.929703 | -0.793228 |

**TS Ph(MeO)(Me)C<sup>+</sup>-OH<sub>2</sub> F**

1 1

|   |           |           |           |
|---|-----------|-----------|-----------|
| C | -1.222179 | 0.389987  | 0.029383  |
| C | 0.271104  | 0.186990  | 0.046010  |
| O | -2.007194 | -0.341372 | -0.762764 |
| C | -1.749798 | 1.811636  | 0.058737  |
| C | -1.630980 | -1.658678 | -1.241127 |
| C | 1.096604  | 1.188294  | -0.491875 |
| C | 2.479198  | 1.012662  | -0.529523 |
| C | 3.054119  | -0.151482 | -0.018515 |
| C | 2.241488  | -1.148272 | 0.526296  |
| C | 0.858007  | -0.986952 | 0.553956  |
| H | -2.835280 | 1.803626  | 0.193386  |
| H | -1.555172 | 2.278658  | -0.910677 |
| H | -1.273657 | 2.412272  | 0.836848  |
| H | -1.667146 | -2.383034 | -0.424305 |
| H | -0.638800 | -1.634168 | -1.693778 |
| H | -2.386154 | -1.901097 | -1.987318 |
| H | 0.672541  | 2.101884  | -0.893538 |
| H | 3.105049  | 1.791060  | -0.954385 |
| H | 4.131633  | -0.281972 | -0.042761 |
| H | 2.683183  | -2.054771 | 0.928244  |
| H | 0.243200  | -1.772740 | 0.980993  |
| O | -1.639343 | -0.201377 | 1.554378  |
| H | -1.103845 | 0.170875  | 2.285252  |
| H | -2.588631 | -0.053711 | 1.749082  |

1 22 1.688 F

**Me<sub>2</sub>(OMe)C<sup>+</sup> C<sub>s</sub> foft**

1 1

|   |           |           |           |
|---|-----------|-----------|-----------|
| C | 0.466583  | -0.004026 | 0.000029  |
| C | 0.393172  | 1.478411  | 0.000029  |
| O | -0.574600 | -0.737028 | -0.000032 |
| C | 1.755234  | -0.726942 | -0.000017 |
| C | -1.947479 | -0.204345 | 0.000014  |
| H | 1.388046  | 1.924410  | 0.001250  |
| H | -0.161820 | 1.831591  | 0.880522  |
| H | -0.159364 | 1.831408  | -0.882128 |
| H | 1.617752  | -1.808622 | -0.000658 |
| H | 2.340134  | -0.414015 | 0.876982  |
| H | 2.340805  | -0.412962 | -0.876161 |
| H | -2.098374 | 0.386796  | 0.904509  |
| H | -2.577759 | -1.090178 | -0.001390 |
| H | -2.097672 | 0.389207  | -0.903002 |

**TS Me<sub>2</sub>(OMe)C<sup>+</sup>-OH<sub>2</sub> F**

1 1

|   |           |           |           |
|---|-----------|-----------|-----------|
| C | 0.335204  | 0.126210  | -0.140188 |
| C | 0.250528  | 1.440256  | 0.602304  |
| O | -0.763802 | -0.399199 | -0.671701 |
| C | 1.511618  | -0.060659 | -1.070816 |
| C | -2.078666 | -0.098522 | -0.126439 |
| H | 1.222788  | 1.719301  | 1.016933  |
| H | -0.491346 | 1.421353  | 1.402721  |
| H | -0.032065 | 2.213939  | -0.120446 |
| H | 1.509025  | -1.063031 | -1.507682 |
| H | 2.464080  | 0.134616  | -0.571113 |
| H | 1.407891  | 0.658632  | -1.890220 |
| H | -2.125394 | -0.361683 | 0.933238  |
| H | -2.763169 | -0.721876 | -0.699147 |
| H | -2.318318 | 0.955711  | -0.278437 |
| O | 0.631724  | -0.940255 | 1.134202  |
| H | 1.476186  | -0.820569 | 1.616132  |
| H | 0.594842  | -1.864461 | 0.808846  |

1 15 1.688 F

**Ph(MeO)CH<sup>+</sup> Cs fopt**

1 1

|   |           |           |           |
|---|-----------|-----------|-----------|
| C | -1.317944 | 0.531526  | -0.000091 |
| C | 0.056980  | 0.223099  | -0.000030 |
| O | -2.221402 | -0.379926 | -0.000045 |
| C | -3.642224 | -0.036511 | 0.000092  |
| C | 0.975865  | 1.307434  | 0.000001  |
| C | 2.337117  | 1.052275  | 0.000047  |
| C | 2.790256  | -0.274385 | 0.000031  |
| C | 1.890658  | -1.355653 | 0.000001  |
| C | 0.529238  | -1.118667 | -0.000014 |
| H | -1.647380 | 1.574144  | -0.000258 |
| H | -4.067075 | -0.488339 | -0.896316 |
| H | -3.768108 | 1.048298  | -0.000838 |
| H | -4.066617 | -0.486767 | 0.897508  |
| H | 0.607519  | 2.329818  | -0.000014 |
| H | 3.047902  | 1.871687  | 0.000092  |
| H | 3.858401  | -0.472002 | 0.000031  |
| H | 2.267381  | -2.373079 | -0.000045 |
| H | -0.180479 | -1.939056 | -0.000030 |

**TS Ph(MeO)CH<sup>+</sup>-OH<sub>2</sub> F**

1 1

|   |           |           |           |
|---|-----------|-----------|-----------|
| C | 1.256777  | -0.750674 | -0.149967 |
| C | -0.157948 | -0.310919 | -0.044995 |
| O | 2.222870  | -0.074188 | -0.749305 |
| C | 2.196025  | 1.373719  | -0.868865 |
| C | -1.119042 | -1.148485 | -0.636152 |
| C | -2.465740 | -0.791216 | -0.610125 |
| C | -2.860448 | 0.386541  | 0.027137  |
| C | -1.910478 | 1.211835  | 0.638016  |
| C | -0.561015 | 0.872159  | 0.602047  |
| H | 1.368017  | -1.805893 | -0.401427 |
| H | 2.375340  | 1.835285  | 0.104902  |
| H | 1.243820  | 1.701230  | -1.288940 |
| H | 3.014078  | 1.605432  | -1.548737 |
| H | -0.813469 | -2.068276 | -1.128658 |
| H | -3.203562 | -1.434613 | -1.078551 |
| H | -3.910663 | 0.660658  | 0.055112  |
| H | -2.222673 | 2.120791  | 1.142478  |
| H | 0.165749  | 1.512646  | 1.091443  |
| O | 1.765724  | -0.774921 | 1.459297  |
| H | 1.145260  | -1.230366 | 2.065571  |
| H | 2.660561  | -1.161789 | 1.564293  |

1 19 1.688 F

**Xanthylum<sup>+</sup> C<sub>2</sub>, foft**

1 1

|   |           |           |           |
|---|-----------|-----------|-----------|
| C | 1.215782  | 1.080164  | -0.000007 |
| C | 2.491730  | 1.710835  | 0.000050  |
| C | 3.648556  | 0.972980  | 0.000066  |
| C | 3.580912  | -0.452407 | 0.000025  |
| C | 2.339068  | -1.108629 | -0.000040 |
| C | 1.185767  | -0.349875 | -0.000050 |
| C | 0.000019  | 1.770523  | -0.000024 |
| C | -1.215765 | 1.080192  | -0.000066 |
| C | -2.491695 | 1.710876  | -0.000060 |
| C | -3.648538 | 0.973036  | -0.000071 |
| C | -3.580932 | -0.452354 | -0.000090 |
| C | -2.339090 | -1.108585 | -0.000104 |
| C | -1.185779 | -0.349852 | -0.000092 |
| O | -0.000012 | -1.011971 | -0.000121 |
| O | 4.647655  | -1.247670 | 0.000032  |
| O | -4.647645 | -1.247615 | -0.000140 |
| C | 5.975042  | -0.694107 | 0.000104  |
| C | -5.975059 | -0.694198 | 0.000374  |
| H | 2.537393  | 2.795899  | 0.000085  |
| H | 4.608240  | 1.474225  | 0.000101  |
| H | 2.297330  | -2.191345 | -0.000074 |
| H | 0.000030  | 2.858242  | 0.000005  |
| H | -2.537357 | 2.795941  | -0.000047 |
| H | -4.608194 | 1.474327  | -0.000055 |
| H | -2.297359 | -2.191302 | -0.000136 |
| H | 6.641227  | -1.555596 | 0.000112  |
| H | 6.144695  | -0.094520 | 0.899812  |
| H | 6.144777  | -0.094482 | -0.899563 |
| H | -6.641177 | -1.555737 | 0.000475  |
| H | -6.145157 | -0.094481 | -0.899169 |
| H | -6.144535 | -0.094714 | 0.900188  |

### TS Xanthylum<sup>+</sup>-OH<sub>2</sub> F

1 1

|   |           |           |           |
|---|-----------|-----------|-----------|
| C | -1.231018 | 0.900936  | -0.200497 |
| C | -2.490456 | 1.451579  | -0.518458 |
| C | -3.648971 | 0.700257  | -0.441326 |
| C | -3.574168 | -0.653339 | -0.033824 |
| C | -2.332113 | -1.229260 | 0.273482  |
| C | -1.183914 | -0.459740 | 0.182153  |
| C | -0.000191 | 1.677800  | -0.221326 |
| C | 1.231549  | 0.902497  | -0.199217 |
| C | 2.491741  | 1.454634  | -0.511349 |
| C | 3.649183  | 0.702154  | -0.436577 |
| C | 3.573343  | -0.653552 | -0.035680 |
| C | 2.331120  | -1.229936 | 0.269774  |
| C | 1.183341  | -0.459472 | 0.180561  |
| O | -0.000191 | -1.084752 | 0.458635  |
| O | -4.630263 | -1.470816 | 0.076190  |
| O | 4.628957  | -1.471922 | 0.071264  |
| C | -5.940329 | -0.989581 | -0.248017 |
| C | 5.939594  | -0.989746 | -0.249515 |
| H | -2.548160 | 2.488975  | -0.840322 |
| H | -4.599219 | 1.149676  | -0.700442 |
| H | -2.275258 | -2.273334 | 0.558421  |
| H | -0.000641 | 2.549871  | -0.871806 |
| H | 2.549677  | 2.495118  | -0.821561 |
| H | 4.600330  | 1.152989  | -0.689846 |
| H | 2.273603  | -2.274725 | 0.551869  |
| H | -6.606204 | -1.836551 | -0.086059 |
| H | -5.994143 | -0.674255 | -1.295599 |
| H | -6.229403 | -0.163516 | 0.410911  |
| H | 6.604721  | -1.838157 | -0.092074 |
| H | 6.228866  | -0.167721 | 0.414319  |
| H | 5.994139  | -0.668409 | -1.295210 |
| O | 0.018112  | 2.592712  | 1.197116  |
| H | -0.839578 | 2.523593  | 1.668326  |
| H | 0.716091  | 2.263283  | 1.802335  |

7 32 F 1.688

**Table S1.**

B3LYP/6-31G(d)//SMD calculated  $\Delta G^\ddagger$  values for the water solvation of a selected set of carbocations ( $R^+$ ; see Fig. 1 in the main text), together with the corresponding calculated  $\Delta G$  and  $\lambda$  values required to use Marcus Eq 3 (see the main text), in water solution. All data in kcal/mol. The symmetry group of the most stable  $R^+$  conformation used for the computations are given into parenthesis.

| $R^+$                                                                         | $\lambda_i$ | $\lambda_o^{EL}$ | $\Delta G$ | $\Delta G^\ddagger^a$ |
|-------------------------------------------------------------------------------|-------------|------------------|------------|-----------------------|
| <i>t</i> -Bu <sup>+</sup><br>( $C_{3v}$ )                                     | 15.7        | 6.27             | -35.0      | 7.49                  |
| Bn <sup>+</sup><br>( $C_{2v}$ )                                               | 13.3        | 4.96             | -31.2      | 5.94                  |
| Ph(Me)CH <sup>+</sup><br>( $C_s$ )                                            | 15.5        | 5.37             | -25.6      | 10.0                  |
| Benzhydryl <sup>+</sup><br>( $C_2$ )                                          | 8.48        | 4.74             | 5.16       | 21.6                  |
| Cumyl <sup>+</sup><br>( $C_s$ )                                               | 15.8        | 4.71             | -21.7      | 11.1                  |
| ( <i>p</i> -MeOPh)(CF <sub>3</sub> ) <sub>2</sub> C <sup>+</sup><br>( $C_s$ ) | 15.7        | 4.96             | -19.5      | 12.1                  |
| ( <i>p</i> -MeOPh)(Me) <sub>2</sub> C <sup>+</sup><br>( $C_s$ )               | 16.0        | 4.87             | -15.7      | 13.7                  |
| Trityl <sup>+</sup><br>( $C_{3v}$ )                                           | 11.0        | 4.31             | -8.54      | 11.4                  |
| Tropylium <sup>+</sup><br>( $D_7$ )                                           | 17.3        | 5.35             | 1.75       | 23.6                  |
| Ph(MeO) <sub>2</sub> C <sup>+</sup><br>( $C_1$ )                              | 26.2        | 4.57             | -14.9      | 24.2                  |
| Ph(CH <sub>2</sub> O) <sub>2</sub> C <sup>+</sup><br>( $C_{2v}$ )             | 16.7        | 4.90             | 6.64       | 24.9                  |
| (MeO) <sub>3</sub> C <sup>+</sup><br>( $C_{3h}$ )                             | 14.3        | 5.35             | -20.2      | 13.9                  |
| (MeO)(CH <sub>2</sub> O) <sub>2</sub> C <sup>+</sup><br>( $C_1$ )             | 19.4        | 5.90             | -22.2      | 15.5                  |
| Me(CH <sub>2</sub> O) <sub>2</sub> C <sup>+</sup><br>( $C_s$ )                | 16.6        | 5.76             | -9.08      | 18.0                  |
| Me(MeO) <sub>2</sub> C <sup>+</sup><br>( $C_1$ )                              | 16.6        | 5.60             | -11.9      | 16.6                  |
| Ph(MeO)(Me)C <sup>+</sup><br>( $C_1$ )                                        | 15.2        | 5.00             | -27.2      | 8.86                  |
| Me <sub>2</sub> (MeO)C <sup>+</sup><br>( $C_s$ )                              | 16.6        | 5.92             | -18.0      | 14.4                  |
| Ph(MeO)CH <sup>+</sup><br>( $C_s$ )                                           | 22.3        | 5.30             | -17.8      | 19.4                  |
| Xanthylium <sup>+</sup><br>( $C_{2v}$ )                                       | 17.8        | 5.11             | 1.26       | 22.9                  |
